# Supplementary material for: Different amine-functionalized poly(diphenylsubstituted acetylenes) from the same precursor
Source: Royal Society of Chemistry journal article supplement (doi:10.1039/c6py01175f), 2016-01-01
Supplement: c6py01175f1.pdf [file c6py01175f1.pdf]

*Electronic Supplementary Information for*

**Different Amine-Functionalized Poly(diphenylsubstituted acetylenes) From  
Same Precursor**

Xiao Wang<sup>a</sup>, Yuan Gao<sup>a</sup>, Wenjie Wang<sup>a</sup>, Anjun Qin<sup>b</sup>, Jing Zhi Sun<sup>\*,a</sup>, Ben Zhong Tang<sup>\*,a,b,c</sup>

<sup>a</sup> MOE Key Laboratory of Macromolecular Synthesis and Functionalization, Department of Polymer Science and Engineering, Zhejiang University, Hangzhou 310027, China

<sup>b</sup> Guangdong Innovative Research Team, State Key Laboratory of Luminescent Materials and Devices, South China University of Technology, Guangzhou 510640, China

<sup>c</sup> Department of Chemistry, Jockey Club Institute for Advanced Study, Institute of Molecular Functional Materials, State Key Laboratory of Molecular Neuroscience, Division of Biomedical Engineering, and Hong Kong Branch of Chinese National Engineering Research Center for Tissue Restoration and Reconstruction (CNERC-HK Branch). The Hong Kong University of Science & Technology, Clear Water Bay, Kowloon, Hong Kong, China.

**Contents**

|                                                                                                                                         |    |
|-----------------------------------------------------------------------------------------------------------------------------------------|----|
| <b>Figure S1.</b> <sup>19</sup> F NMR spectra of precursor polymer <b>P0</b> in CDCl <sub>3</sub> and <b>P2</b> in methanol- <i>d</i> . | S2 |
| <b>Figure S2.</b> Absorption spectrum of pristine GO.                                                                                   | S2 |
| <b>Figure S3.</b> Photographs of the emission for the pristine GO powder and <b>P2</b> /GO hybrid solid.                                | S3 |
| <b>Figure S4.</b> Emission spectrum of the pristine GO.                                                                                 | S3 |

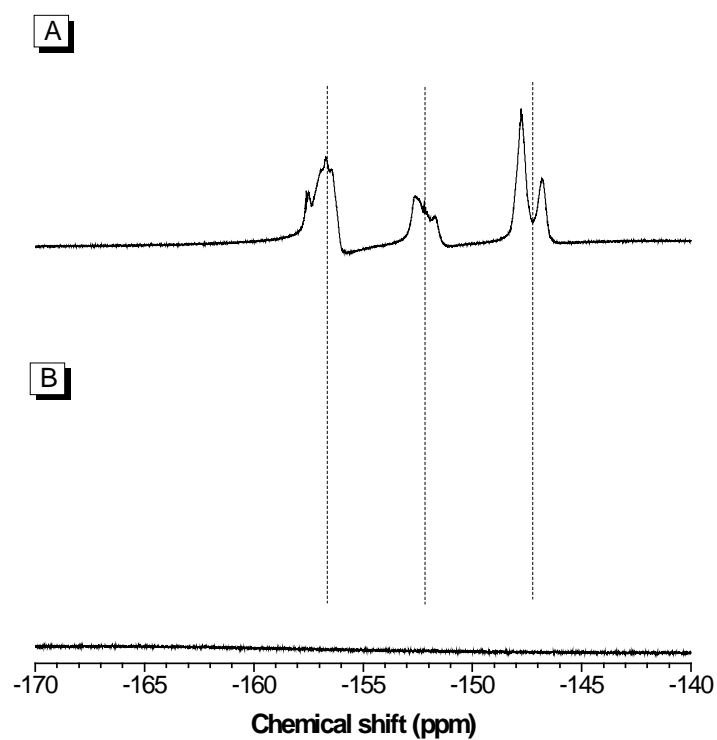

**Figure S1.**  $^{19}\text{F}$  NMR spectra of (A) P0 in  $\text{CDCl}_3$  and (B) P2 in  $\text{methanol-}d$ .

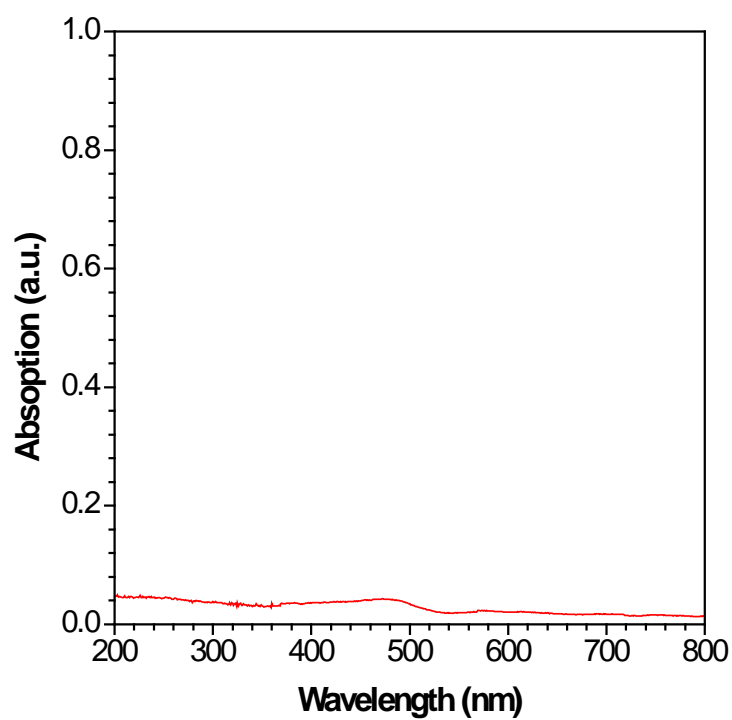

**Figure S2.** Absorption spectrum of pristine GO

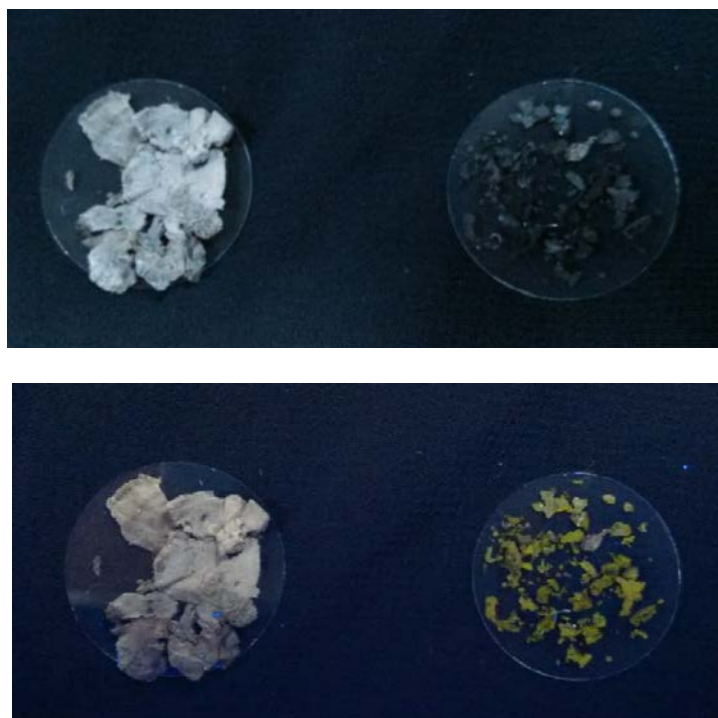

**Figure S3.** Photographs of the pristine GO powder and P2/GO hybrid solid under daylight (upper) and UV lamp irradiated by 365 nm (lower).

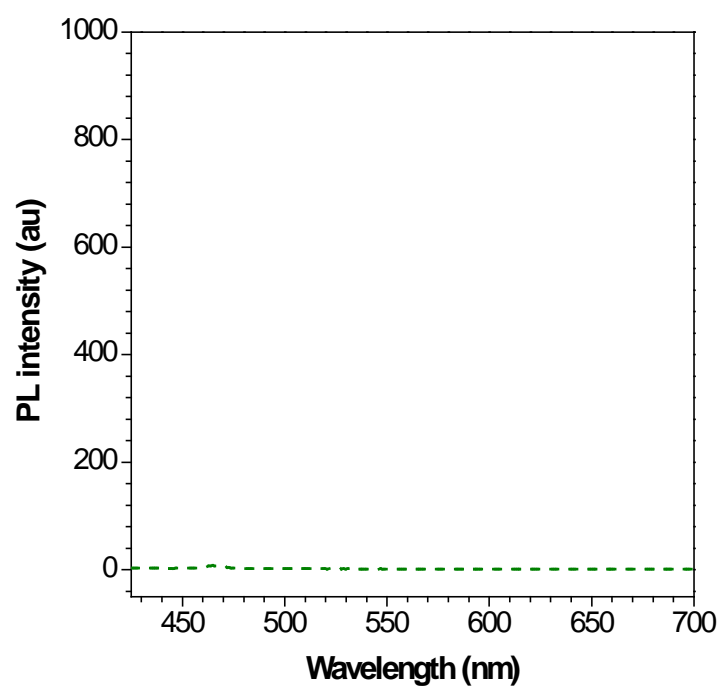

**Figure S4.** Emission spectrum of the pristine GO.
